# Supplementary material for: Sex Dimorphic Effects of Bile Acid Metabolism in Liver Cancer in Mice
Source: PubMed Central journal article supplement — Cell Mol Gastroenterol Hepatol. 2024 Jan 21;17(5):719–35. doi: 10.1016/j.jcmgh.2024.01.011 (PMC10966305; doi:10.1016/j.jcmgh.2024.01.011), 2024-01-21
Supplement: mmc1.pdf [file mmc1.pdf]

**Supplementary Table 1: Oligonucleotide sequences for quantitative RT-PCR**

| <b>Gene</b>    | <b>Forward Primer (5'----3')</b> | <b>Reverse Primer (5'----3')</b> |
|----------------|----------------------------------|----------------------------------|
| <i>36B4</i>    | GTC CTG GCA TTG TCT GTG GA       | GGC TGA CTT GGT TGC TTT GG       |
| <i>Cyp7a1</i>  | CAA TGA AAG CAG CCT CTG AAG      | AGC CTC CTT GAT GAT GCT ATC      |
| <i>Cyp8b1</i>  | TAG CCC TGT TAG AGT GTG TGT GAC  | AGT CAG GAT CTC TCC CTG AAC TTG  |
| <i>Cyp27a1</i> | GCC TTG CAC AAG GAA GTG ACT      | CGC AGG GTC TCC TTA ATC ACA      |
| <i>Cyp7b1</i>  | GAA AAC TCT TCA AAG GCA ACA TGG  | ACT GGA AAG GGT TCA GAA CAA ATG  |
| <i>Hnf4a</i>   | AGA CAA AGA TAA GAG GAA CCA G    | CAG AGA TGG GAG AGG TGA          |
| <i>Shp</i>     | TCT GGA GCC TTG AGC TGG GT       | GCC TTG GCT GGC TGG GTA C        |
| <i>Fgfr4</i>   | CTC GGA AAG CCC CTG GGT GA       | AGC TTC ATC ACC TCC ATC TCG      |
| <i>Klb</i>     | GTG GTG AGC GAA GGA CTG AA       | TCG TGC GGT TGT ACA TGT CA       |
| <i>Slc10a1</i> | ATC TGA CCA GCA TTG AGG CTC T    | CCG TCG TAG ATT CCT TGC TGT      |
| <i>Slco1b2</i> | ACC AAA CTC AGC ATC CAA GC       | TAG CTG AAT GAG AGG GCT GC       |
| <i>Abcb11</i>  | CAC ACA AAG CCC CTA CCA GT       | CCA GAG GCA GCT ATC AGG AC       |
| <i>Abcb4</i>   | ATT CGG GAC TAG GTG GTG GA       | TCA GTG GTG CCC TTG ATG TC       |
| <i>Fgf15</i>   | CCA ACT GCT TCC TCC GAA TCC      | TAC AGT CTT CCT CCG AGT AGC      |
| <i>Asbt</i>    | GGA ACT GGC TCC AAT ATC CTG      | TCC AAT CAC AGC TAT GAG CAC      |
| <i>Fabp6</i>   | CAG GAC GGA CAG GAC TTC AC       | GCT CAT AGG TCA CAT CCC CG       |
| <i>Osta</i>    | GCC AGG CAG GAC TCA TAT CAA A    | GGC AAC TGA GCC AGT GGT AAG A    |
| <i>Ost β</i>   | GAC AAG CAT GTT CCT CCT GAG      | GAT GCA GGT CTT CTG GTG TTT C    |
| <i>Cyp3a11</i> | TGG AGT GAA CGT GGA TTC CC       | TAG AAT CCA GGC GGC TTT CC       |
| <i>Cyp2b10</i> | GCG CAT GGA GAA GGA GAA GT       | GCG GTC ATC AAG GGT TGG TA       |
| <i>Sult2a1</i> | ACC TCC CAT CTT CCC ATC CA       | TCC GAG TGA CCC TGG ATT CT       |
| <i>Sult2a8</i> | ATG GCC TCT CTC CTT CCC AT       | TGG CAC TTG TTC CTT TCC CT       |
| <i>Baat</i>    | AGA TCT GGA GCA TGA CCC CT       | CCA CCT TTC CAG AGT CAG GC       |
| <i>Slc27a5</i> | GTA ACG TCC CTG AGC AAC CA       | TAA GCC CAC ATT GCC CTC TG       |
| <i>Ugt2b1</i>  | GTG CTG GTG TGG CCT ACA G        | ATT GCT CGG CCC AAT GAG G        |
| <i>Ugt2b5</i>  | CAA TGG TGT CTA CGA GGC GA       | CCA GGG GTT TCA TAG GCT GG       |
| <i>Ugt3a1</i>  | GCC TTG GAT TTT GCT CGT CC       | GTC CAT AGC ACC CCT TGA GG       |
| <i>Gba2</i>    | TCA AGG CTT CCT GGA GGA CAT G    | TGG TCT GCG TAG CCT CCA TTC T    |
| <i>Myc</i>     | ATT TCC TTT GGG CGT TGG AAA C    | TCC TCG TCG CAG ATG AAA TAG G    |
| <i>Ccnd1</i>   | CGC CCT CCG TAT CTT ACT TCA      | CTC CTC ACA GAC CTC CAG CAT      |
| <i>Ccne1</i>   | CAC AGC TTC GGG TCT GAG TT       | TTC TGG AGC GGA CTG AAA GG       |
| <i>Cdk2a</i>   | GTC TTT GTG TAC CGC TGG GAA C    | TTA GCT CTG CTC TTG GGA TTG G    |
